# Supplementary material
Source: Research Square preprint supplement (doi:10.21203/rs.3.rs-10202940/v1)
Supplement: Supplementary file 2 [file db681c6aeba3961185403b5c.docx]

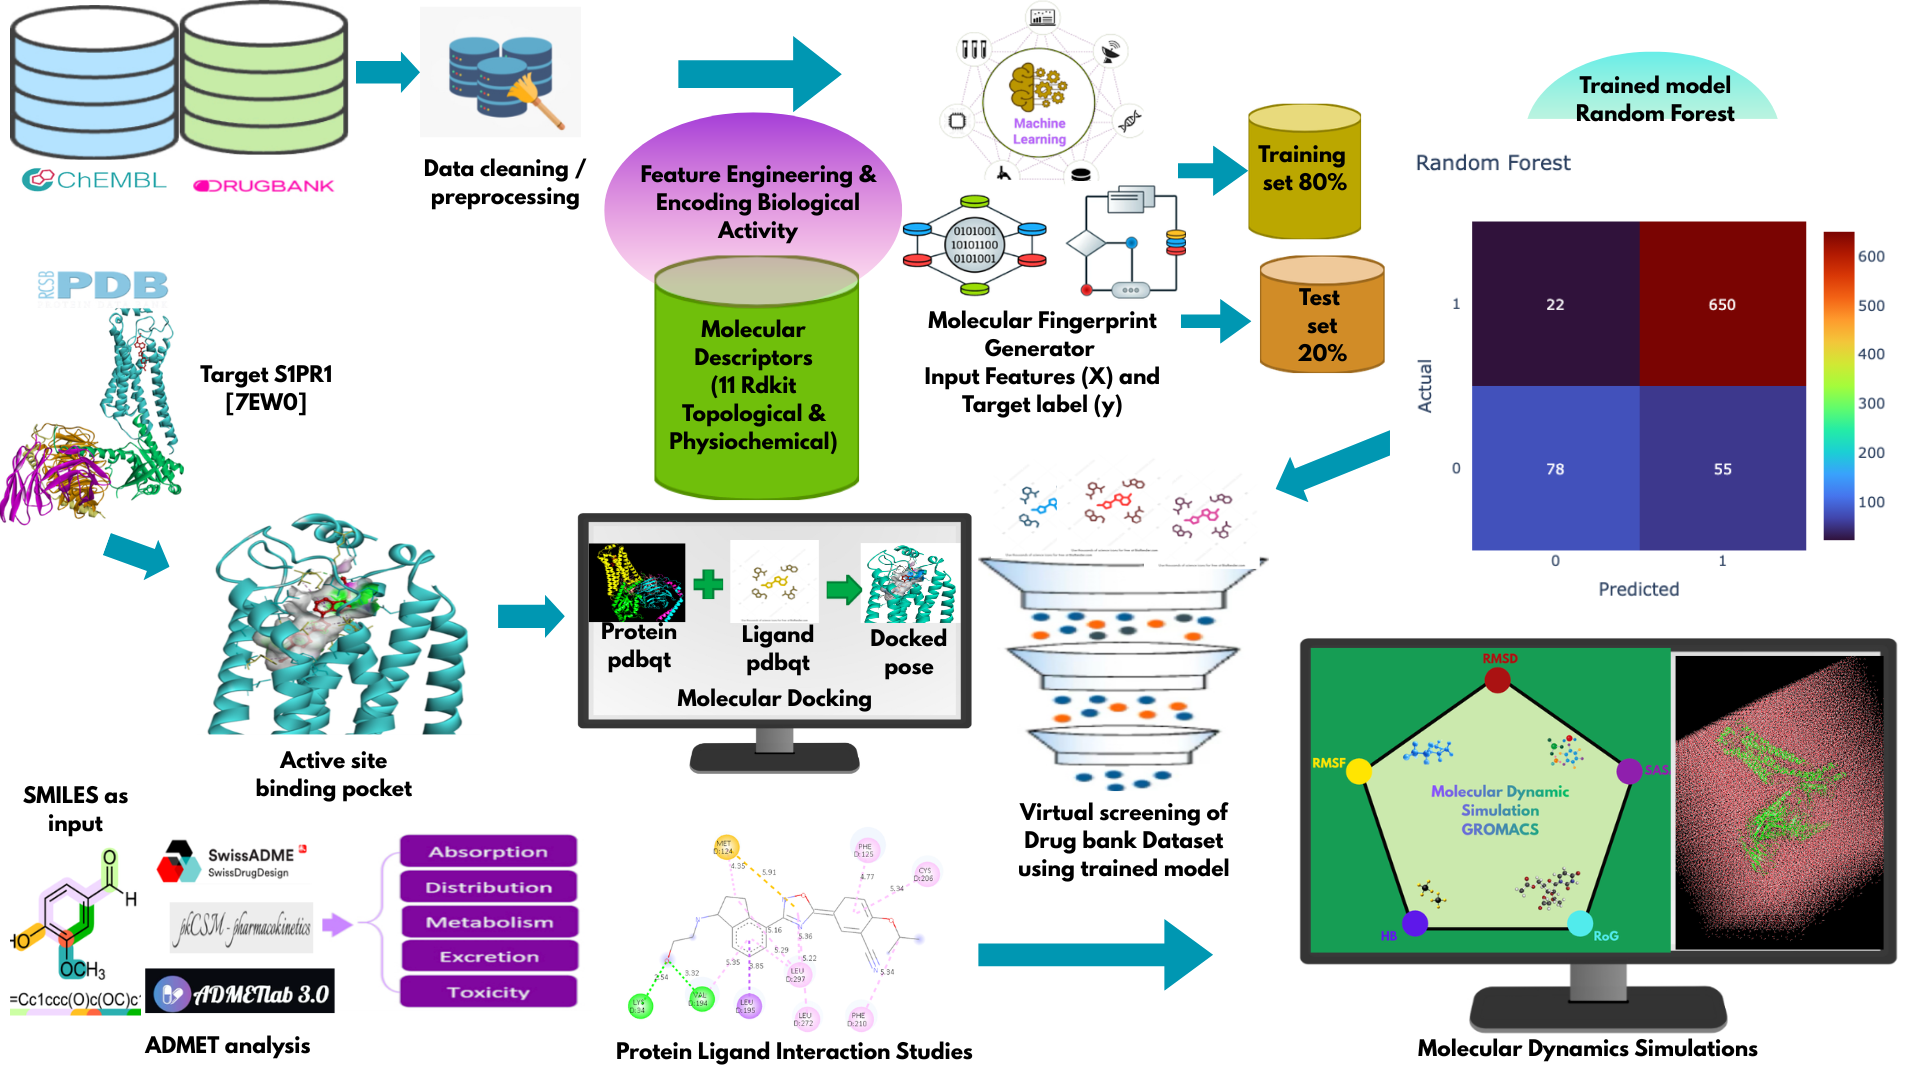


**Schematic overview of the integrated AI-driven drug discovery workflow for S1PR1, illustrating data retrieval (ChEMBL, DrugBank, PDB), preprocessing and feature engineering, molecular descriptor and fingerprint generation, machine learning–based virtual screening, molecular docking, downstream interaction analysis and MD simulation.**
